# Supplementary material for: The Relationship between Crystal Structure and Mechanical Performance for Fabrication of Regenerated Cellulose Film through Coagulation Conditions
Source: MDPI journal article supplement (doi:10.3390/polym13244450), 2021-12-18
Supplement: s1 [file s1]

## Supplementary Materials

# The Relationship between Crystal Structure and Mechanical Performance for Fabrication of Regenerated Cellulose Film through Coagulation Conditions

Tessei Kawano <sup>1</sup>, Satoshi Iikubo <sup>1</sup> and Yoshito Andou <sup>1,2,\*</sup>

<sup>1</sup> Department of Life Science and Systems Engineering, Graduate School of Life Science and Systems Engineering, Kyushu Institute of Technology, 2-4 Hibikino, Wakamatsu, Kitakyushu 808-0196, Fukuoka, Japan; kawano.tessei758@mail.kyutech.jp (T.K.); iikubo@life.kyutech.ac.jp (S.I.)

<sup>2</sup> Department of Advanced Materials Science and Engineering, Faculty of Engineering Sciences, Kyushu University, Kasuga 816-8580, Fukuoka, Japan

<sup>3</sup> Collaborative Research Centre for Green Materials on Environmental Technology, Kyushu Institute of Technology, 2-4 Hibikino, Wakamatsu, Kitakyushu 808-0196, Fukuoka, Japan

\* Correspondence: yando@life.kyutech.ac.jp

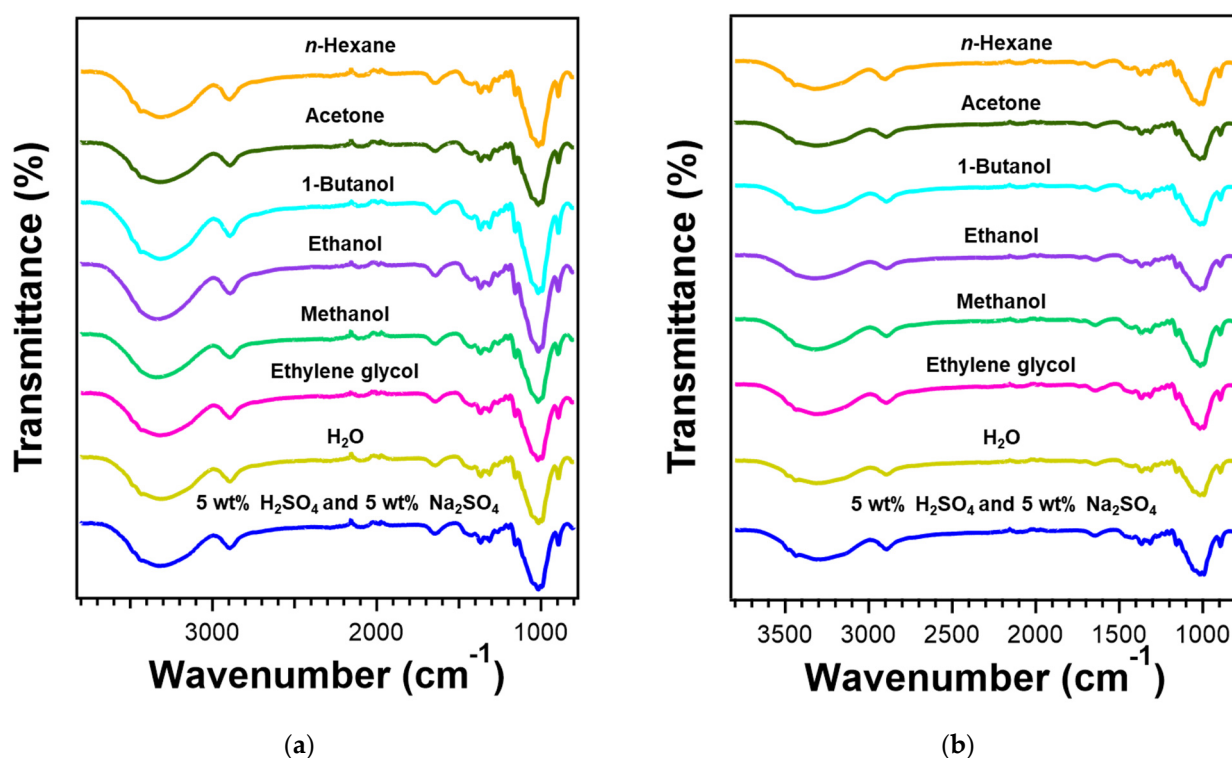

**Figure S1.** FT-IR spectra of regenerated cellulose film prepared from (a) CNF and (b) MCC using various solvents as a coagulant.

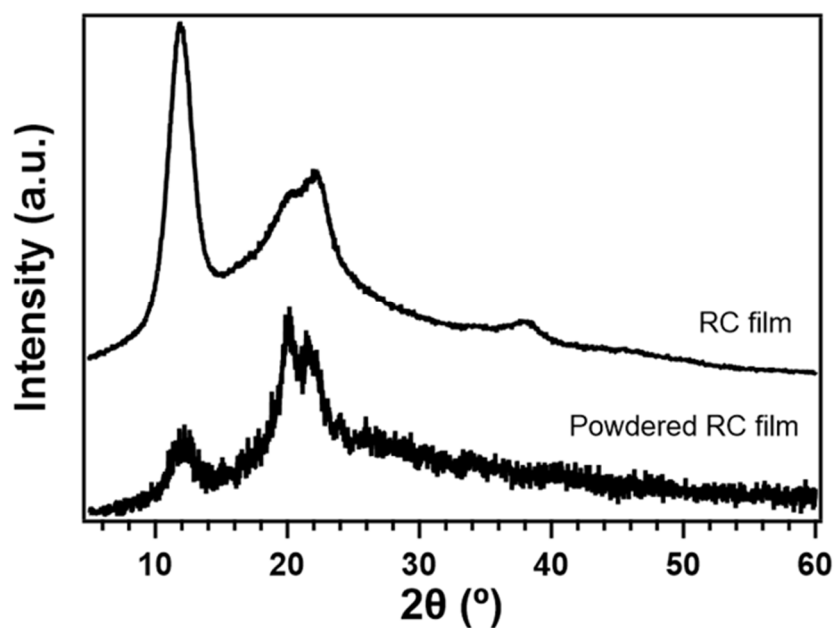

**Figure S2.** XRD spectra of the pristine and powdered regenerated cellulose film prepared from MCC through coagulation with 5 wt% H<sub>2</sub>SO<sub>4</sub> aqueous solution containing 5 wt% Na<sub>2</sub>SO<sub>4</sub>.

**Table S1.** Mechanical properties of regenerated cellulose film.

| Cellulose | Coagulant                                                                      | Tensile strength (MPa) | Elongation at break (%) | Young's modulus (GPa) |
|-----------|--------------------------------------------------------------------------------|------------------------|-------------------------|-----------------------|
| CNF       | 5 wt% H <sub>2</sub> SO <sub>4</sub> and 5 wt% Na <sub>2</sub> SO <sub>4</sub> | 75.95 ± 1.38           | 4.69 ± 0.93             | 3.96 ± 0.35           |
|           | H <sub>2</sub> O                                                               | 75.09 ± 7.55           | 5.97 ± 1.84             | 3.91 ± 0.25           |
|           | Ethylene glycol                                                                | 49.54 ± 4.72           | 2.16 ± 0.12             | 2.66 ± 0.51           |
|           | Methanol                                                                       | 86.75 ± 6.69           | 12.91 ± 2.76            | 2.94 ± 0.45           |
|           | Ethanol                                                                        | 72.57 ± 9.95           | 8.92 ± 0.84             | 3.39 ± 0.10           |
|           | 1-Butanol                                                                      | 75.09 ± 9.09           | 2.43 ± 0.45             | 3.58 ± 0.13           |
|           | Acetone                                                                        | 68.89 ± 2.10           | 11.88 ± 1.24            | 3.53 ± 0.19           |
|           | <i>n</i> -Hexane                                                               | 48.59 ± 4.37           | 8.39 ± 2.03             | 2.37 ± 0.12           |
| MCC       | 5 wt% H <sub>2</sub> SO <sub>4</sub> and 5 wt% Na <sub>2</sub> SO <sub>4</sub> | 75.85 ± 12.14          | 2.30 ± 0.36             | 4.28 ± 0.79           |
|           | H <sub>2</sub> O                                                               | 17.04 ± 4.25           | 0.79 ± 0.10             | 1.89 ± 0.49           |
|           | Ethylene glycol                                                                | 27.70 ± 9.85           | 1.13 ± 0.11             | 2.20 ± 1.15           |
|           | Methanol                                                                       | 77.08 ± 8.38           | 5.56 ± 2.04             | 2.65 ± 0.22           |
|           | Ethanol                                                                        | 81.31 ± 6.32           | 4.15 ± 0.95             | 3.21 ± 0.27           |
|           | 1-Butanol                                                                      | 29.21 ± 4.78           | 1.22 ± 0.15             | 2.44 ± 0.23           |
|           | Acetone                                                                        | 65.83 ± 5.98           | 2.38 ± 0.25             | 3.25 ± 0.88           |
|           | <i>n</i> -Hexane                                                               | 19.42 ± 2.24           | 1.20 ± 0.11             | 1.04 ± 0.17           |

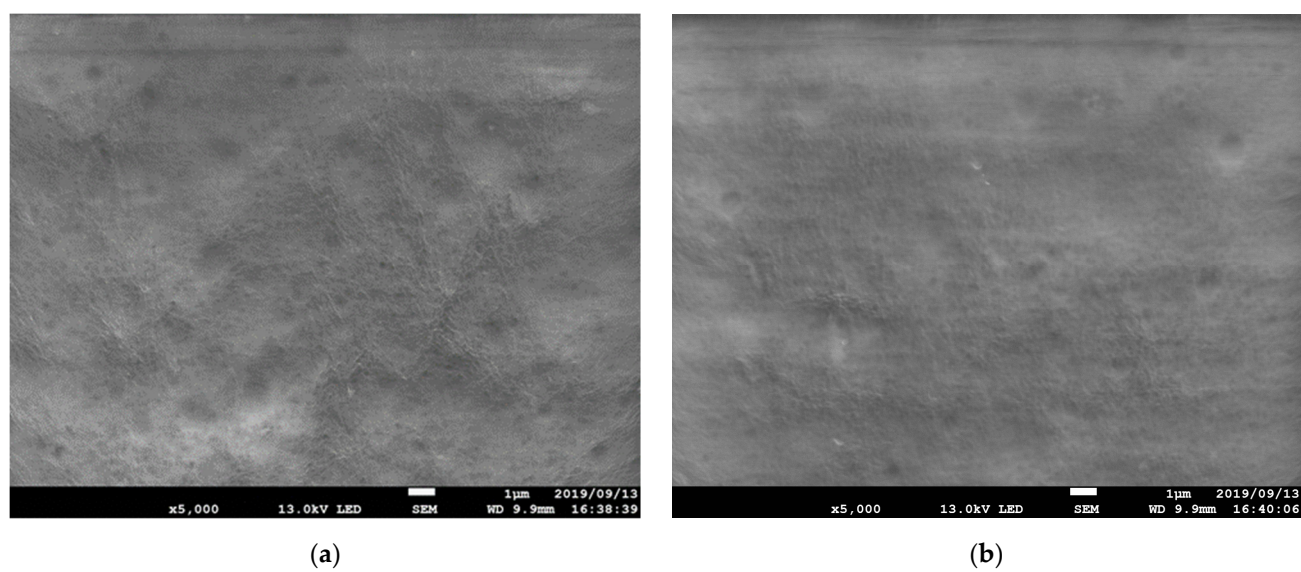

**Figure S3.** SEM images of RC films prepared from CNF through coagulation with (a) 5 wt% H<sub>2</sub>SO<sub>4</sub> aqueous solution containing 5 wt% Na<sub>2</sub>SO<sub>4</sub> and (b) methanol.
